# Supplementary material
Source: Research Square preprint supplement (doi:10.21203/rs.3.rs-9971450/v1)
Supplement: Supplementary file 1 [file 284b8b074ad46a792e7cf2f7.pdf]

## Habitual Physical Activity Preserves Energetically Constrained Mitochondrial Programs During Human Skeletal Muscle Aging

Ceereena Ubaida-Mohien, Stefano Donega, Alexey Lyashkov, Yevgeniya Lukyanenko, Shepherd H. Schurman, Arsun Bektas, Jaekwan Kim, Perry Kuo, Linda Zukley, Mary Kaileh, Kenneth Fishbein, Nan-Ping Weng, Chee W. Chia, Ranjan Sen, María Carmen Gómez-Cabrera, Luigi Ferrucci

### Supplementary Tables

**Supplementary Table S1. Definitions of key variables and derived metrics used in this study**

| Term                                          | Definition                                                               | Type                            | Notes                                                                                                    |
|-----------------------------------------------|--------------------------------------------------------------------------|---------------------------------|----------------------------------------------------------------------------------------------------------|
| <b>Age</b>                                    | Chronological age in years (23 to 86 years, n=96)                        | Clinical variable               | Modeled as continuous variable                                                                           |
| <b>Habitual Physical Activity</b>             | Self-reported physical activity level (0-3: Not active to Highly active) | Behavioral exposure             | Treated as ordinal numeric variable in regression models                                                 |
| <b>VO<sub>2</sub>peak</b>                     | Peak oxygen consumption (mL·kg <sup>-1</sup> ·min <sup>-1</sup> )        | Physiological exposure          | Measure of cardiorespiratory fitness. Used for rescue classification and energetic alignment score       |
| <b>kPCr</b>                                   | Phosphocreatine recovery rate constant (s <sup>-1</sup> )                | Physiological outcome           | Proxy for mitochondrial ATP production capacity                                                          |
| <b>MitoO<sub>2</sub>Flux (respirometry)</b>   | Skeletal muscle mitochondrial oxygen consumption rate                    | Physiological energetic measure | Used in correlation analyses with mitochondrial proteome scores (Fig. 4A) to validate energetic coupling |
| <b>MitoCoP</b>                                | Curated database of high-confidence mitochondrial proteins (n = 1,134)   | Annotation resource             | Used to define mitochondrial protein set                                                                 |
| <b>Mitochondrial Proteome (Mito proteins)</b> | Proteins annotated as mitochondrial by MitoCoP (n = 741 in dataset)      | Protein subset                  | Background for pathway enrichment                                                                        |

|                                               |                                                                                                                                   |                        |                                                                                          |
|-----------------------------------------------|-----------------------------------------------------------------------------------------------------------------------------------|------------------------|------------------------------------------------------------------------------------------|
| <b>Age-associated proteins</b>                | Proteins with p-value_age < 0.05 in age regression model                                                                          | Derived set            | Significance based on linear regression                                                  |
| <b>PA-associated proteins</b>                 | Proteins with p-value PA < 0.05 in PA model                                                                                       | Derived set            | Direction interpreted relative to age                                                    |
| <b>VO<sub>2</sub>peak-associated proteins</b> | Proteins with p-value VO <sub>2</sub> peak < 0.05 in VO <sub>2</sub> peak model                                                   | Derived set            | Used for rescue comparison                                                               |
| <b>Rescued proteins</b>                       | Proteins with significant age (p<0.05) and exposure effects in opposing directions                                                | Derived classification | $\beta_{age} < 0$ & $\beta_{exposure} > 0$ OR $\beta_{age} > 0$ & $\beta_{exposure} < 0$ |
| <b>Rescue (Normalized proteins)</b>           | Proteins with age $\uparrow$ and exposure $\downarrow$ pattern                                                                    | Derived classification | Used in rescue direction analysis                                                        |
| <b>Non-rescued proteins</b>                   | Proteins not meeting directional rescue criteria                                                                                  | Derived classification | Includes concordant directional effects or nonsignificant exposure effects               |
| <b>MitoScore (741)</b>                        | Mean standardized abundance across all quantified MitoCop annotated mitochondrial proteins (n=741)                                | Composite score        | Full quantified mitochondrial abundance metric                                           |
| <b>OxPhosScore (116)</b>                      | Mean standardized abundance of all oxidative phosphorylation proteins (n=116)                                                     | Composite score        | OxPhos-focused metric                                                                    |
| <b>AgeMitoScore</b>                           | Mean standardized abundance of age-associated mitochondrial proteins (n=195)                                                      | Composite score        | Reflects degree of age-associated remodeling                                             |
| <b>PA-MitoScore</b>                           | Mean standardized abundance of PA-associated mitochondrial proteins (n=231)                                                       | Composite score        | Reflects degree of PA-associated remodeling                                              |
| <b>PA-Rescued Score</b>                       | Mean standardized abundance of physical activity-rescued mitochondrial proteins (n=76, PA p-value < 0.05) and age p-value < 0.05) | Composite score        | Molecular signature of physical activity-aligned rescue                                  |
| <b>VO<sub>2</sub>peak Rescued Score</b>       | Mean standardized abundance of VO <sub>2</sub> peak-                                                                              | Composite score        | Molecular signature of fitness-aligned rescue                                            |

|                                               |                                                                                                                                                       |                         |                                                                      |
|-----------------------------------------------|-------------------------------------------------------------------------------------------------------------------------------------------------------|-------------------------|----------------------------------------------------------------------|
|                                               | rescued mitochondrial proteins (n=163)                                                                                                                |                         |                                                                      |
| <b>Physical activity-Rescue Tertiles</b>      | Low / Medium / High groups defined by tertiles of PA-RescuedScore                                                                                     | Stratification variable | Used in energetic and network analyses                               |
| <b>Composite systemic mitochondrial score</b> | Mean of tissue-specific standardized mitochondrial scores (z-scores) across PBMCs, naïve CD4 T cells, naïve CD8 T cells, and skin for each individual | Composite score         | Higher values indicate greater multi-tissue mitochondrial abundance. |
| <b>Systemic Mitochondrial Coordination</b>    | Correlation structure among mitochondrial scores across tissues                                                                                       | Network metric          | Assessed using Spearman correlations                                 |
| <b>Network Density</b>                        | Proportion of tissue–tissue correlations exceeding threshold                                                                                          | Graph metric            | Calculated as the number of tissue-tissue correlation pairs with     |

**Supplementary Table S2. Definitions of mitochondrial proteomic scores and summary statistics for energetic coupling analyses**

| Section                             | Item           | Definition / model                                              | N / protein set size | Key result                                    |
|-------------------------------------|----------------|-----------------------------------------------------------------|----------------------|-----------------------------------------------|
| <b>a. Panel-specific statistics</b> | <b>Fig. 4a</b> | Raw correlation: Age vs VO <sub>2</sub> peak                    | 96 participants      | r = -0.69                                     |
|                                     |                | Raw correlation: Age vs kPCr                                    | 96 participants      | r = -0.36                                     |
|                                     |                | Raw correlation: VO <sub>2</sub> peak vs kPCr                   | 96 participants      | r = 0.48                                      |
|                                     |                | Raw correlation: PA-rescued score vs kPCr                       | 96 participants      | r = 0.34                                      |
|                                     |                | Raw correlation: PA-rescued score vs VO <sub>2</sub> peak       | 96 participants      | r = 0.15                                      |
|                                     |                | Partial correlation: PA-rescued score vs kPCr, adjusted for age | complete cases       | partial r = 0.43, P = 9.96 × 10 <sup>-5</sup> |

|                                              |                                      |                                                                                                |                                         |                                                                                                                                                          |
|----------------------------------------------|--------------------------------------|------------------------------------------------------------------------------------------------|-----------------------------------------|----------------------------------------------------------------------------------------------------------------------------------------------------------|
| <b>b. Panel-specific statistics</b>          | <b>Fig. 4b</b>                       | Mixed-effects model:<br>RescueScore ~ AgeMitoScore * RescueType + kPCr_group + (1   DonorID)   | 96 donors;<br>192 observations          | AgeMitoScore $\beta$ = 1.361;<br>AgeMitoScore $\times$ VO <sub>2</sub> peak-rescued $\beta$ = -0.271; kPCr-high $\beta$ = 0.0109                         |
|                                              | <b>Fig. 4c</b>                       | kPCr compared across tertiles of PA-rescued score                                              | 96 participants                         | Kruskal–Wallis P = 0.002                                                                                                                                 |
|                                              | <b>Fig. 4d (complete-case)</b>       | physio_energy ~ age_c + pa_score_z                                                             | 78 participants                         | age: $\beta$ = -0.023, P = $8.3 \times 10^{-9}$ ; PA score: $\beta$ = 0.36, P = $1.7 \times 10^{-6}$ ; R <sup>2</sup> = 0.54                             |
|                                              | <b>Fig. 4d (interaction test)</b>    | physio_energy ~ age_c * pa_score_z                                                             | 78 participants                         | age $\times$ PA score: $\beta$ = -0.0046, P = 0.18                                                                                                       |
|                                              | <b>Fig. 4d (multiple imputation)</b> | Pooled linear model after predictive mean matching imputation of kPCr and VO <sub>2</sub> peak | imputed dataset                         | age: $\beta$ = -0.0208, 95% CI -0.0284 to -0.0133, P = $9.6 \times 10^{-7}$ ; PA score: $\beta$ = 0.315, 95% CI 0.168 to 0.462, P = $6.8 \times 10^{-5}$ |
| <b>C. Protein-level overlap / enrichment</b> | <b>Fig. 4e</b>                       | Mitochondrial proteins associated with kPCr after adjustment for age and covariates            | 741 proteins tested                     | 366 proteins associated with kPCr                                                                                                                        |
|                                              |                                      | PA-rescued proteins also associated with kPCr                                                  | 76 PA-rescued proteins                  | 71/76 (93%) nominally associated with kPCr (P < 0.05)                                                                                                    |
|                                              |                                      | Enrichment of PA-rescued proteins among kPCr-associated mitochondrial proteins                 | mitochondrial functional category level | odds ratio = 17.6, 95% CI 7.1–56.5, P < $2.2 \times 10^{-16}$                                                                                            |

Footnote: All proteomic scores were calculated as the mean standardized abundance (z-score) of member proteins per participant. Rescue classes were defined by opposite signs of exposure-associated and age-associated regression coefficients. age\_c denotes age centered at 60 years.

# Supplementary Figures

## Supplementary Fig. 1. Aging selectively drives remodeling of the skeletal muscle mitochondrial proteome

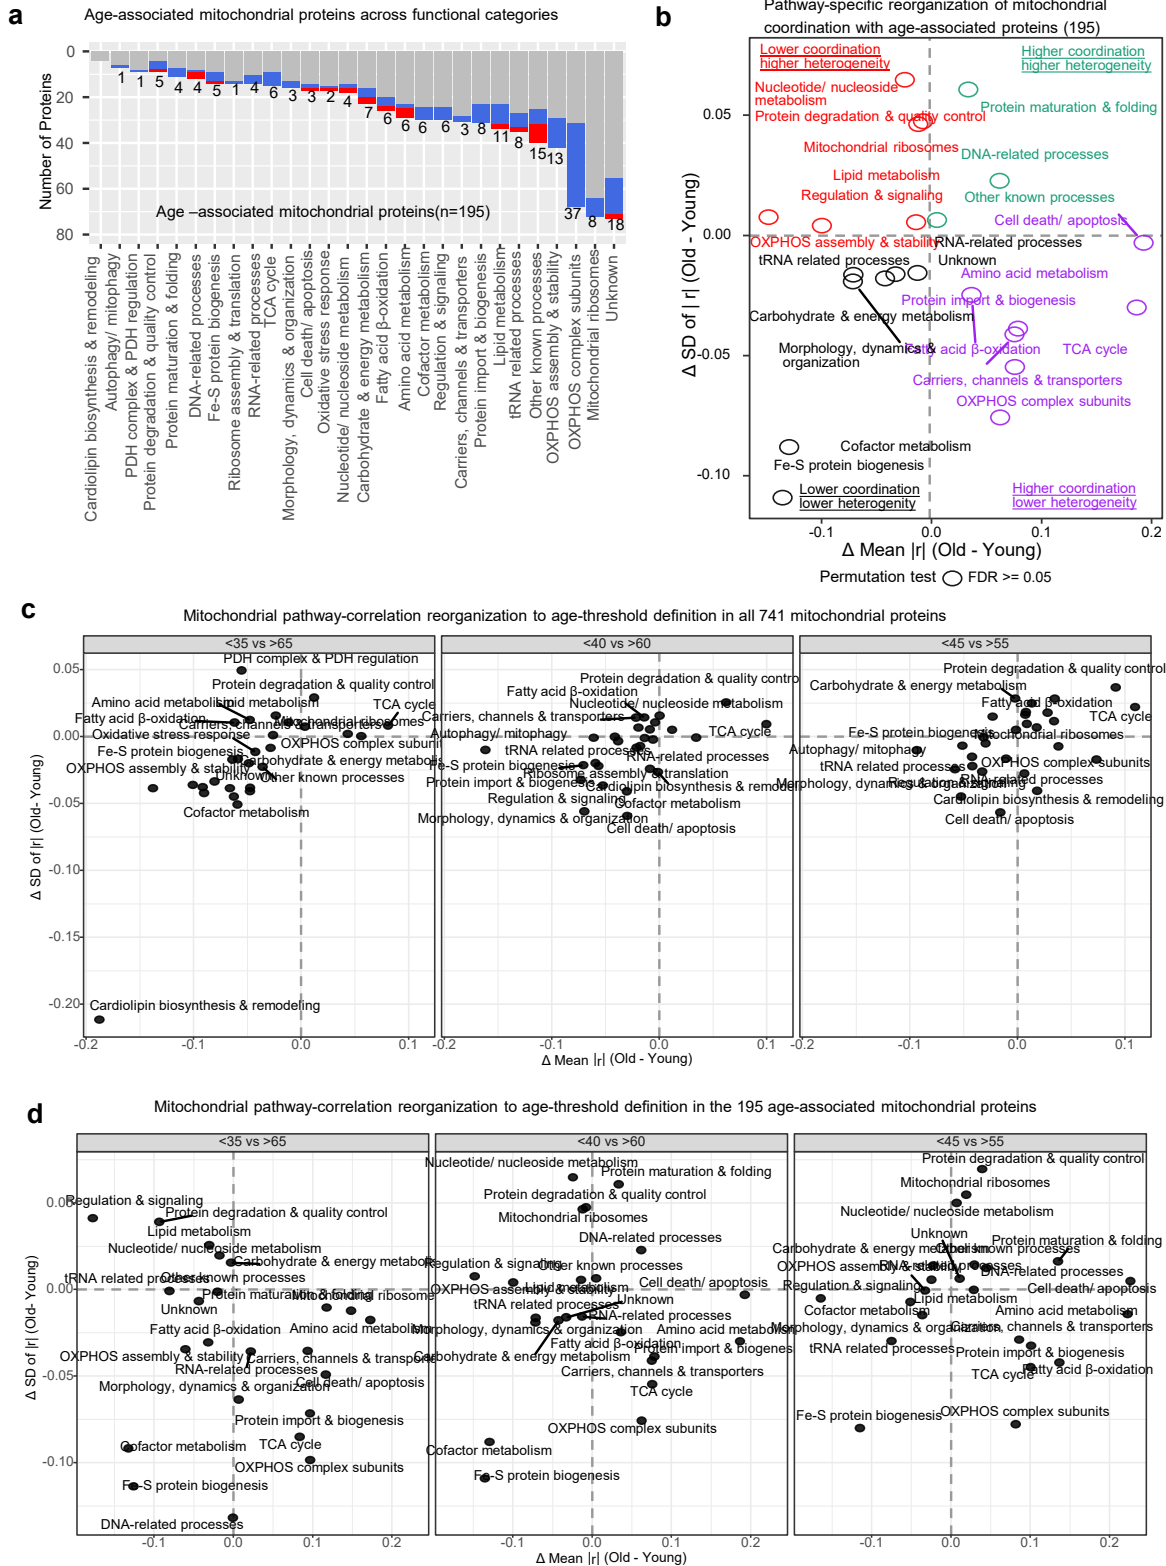

**Supplementary Fig. 1. Aging selectively drives remodeling of the skeletal muscle mitochondrial proteome.** **a**, Age-associated mitochondrial proteins across functional categories. Bar plot shows the number of quantified mitochondrial proteins within each functional category. The number of proteins showing significant age-associated increases or decreases in abundance is indicated adjacent to each bar. **b**, Pathway-level mitochondrial correlation reorganization in the 195 age-associated mitochondrial subset. **c**, Sensitivity of mitochondrial pathway-correlation reorganization to age-threshold definition in all 741 mitochondrial proteins. Pathway-level changes in correlation strength and heterogeneity were recalculated using alternative young/old thresholds. Pathway-level changes in within-category correlation strength ( $\Delta$  mean  $|r|$ ) and correlation heterogeneity ( $\Delta$  SD of  $|r|$ ) were recalculated using alternative age-group definitions (<35 vs >65, <40 vs >60, and <45 vs >55). **d**, Sensitivity of mitochondrial pathway-correlation reorganization to age-threshold definition in the 195 age-associated mitochondrial proteins. The age-sensitive subset showed broadly similar pathway-level patterns across threshold definitions, with greater stability for changes in mean within-pathway correlation than for changes in correlation heterogeneity. The overall pattern was more pronounced in the age-associated subset, and pathway-level changes in mean correlation were more stable across threshold definitions than changes in correlation heterogeneity.

**Supplementary Fig 2. Habitual physical activity preserves bioenergetic components of the aging mitochondrial proteome**

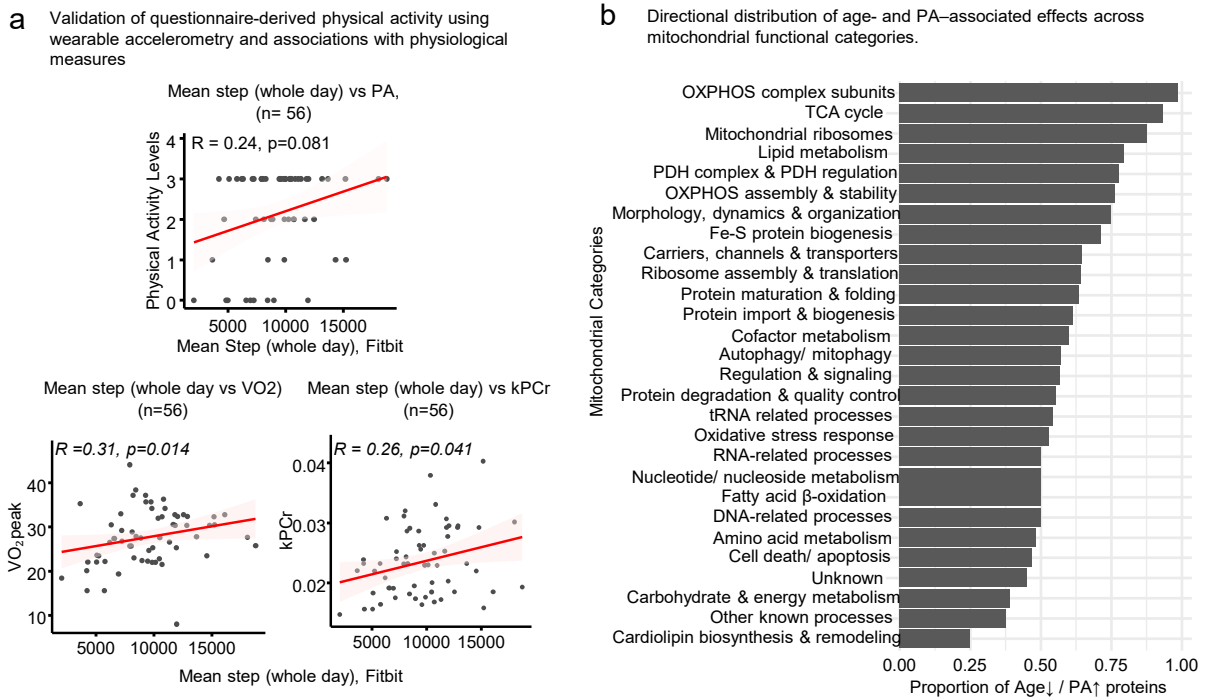

**Supplementary Fig. 2. Habitual physical activity preserves bioenergetic components of the aging mitochondrial proteome.** **a**, Validation of questionnaire-derived physical activity using wearable accelerometry and associations with physiological measures. (Top) Association between questionnaire-derived physical activity (four-level ordinal variable, 0–3) and mean daily step count measured by wearable accelerometry in a subset of participants (n = 56). (Bottom)

Relationship between mean daily step count and  $VO_2$ peak. Relationship between mean daily step count and kPCr. Lines represent linear regression fits with 95% confidence intervals. Statistical significance was determined using Spearman correlation. **b**, Proportion of annotated mitochondrial proteins ( $n = 741$ ) within each functional category exhibiting concordant directional associations with age and physical activity. Bars show the percentage of proteins displaying age-associated decreases with activity-associated increases (Age↓/PA↑) or age-associated increases with activity-associated decreases (Age↑/PA↓). Across mitochondrial categories, the proportion of proteins shows the Age↓/PA↑ pattern ranged from ~34% to 99%.

### Supplementary Fig 3. Cardiorespiratory fitness strongly opposes age-related remodeling of the mitochondrial proteome

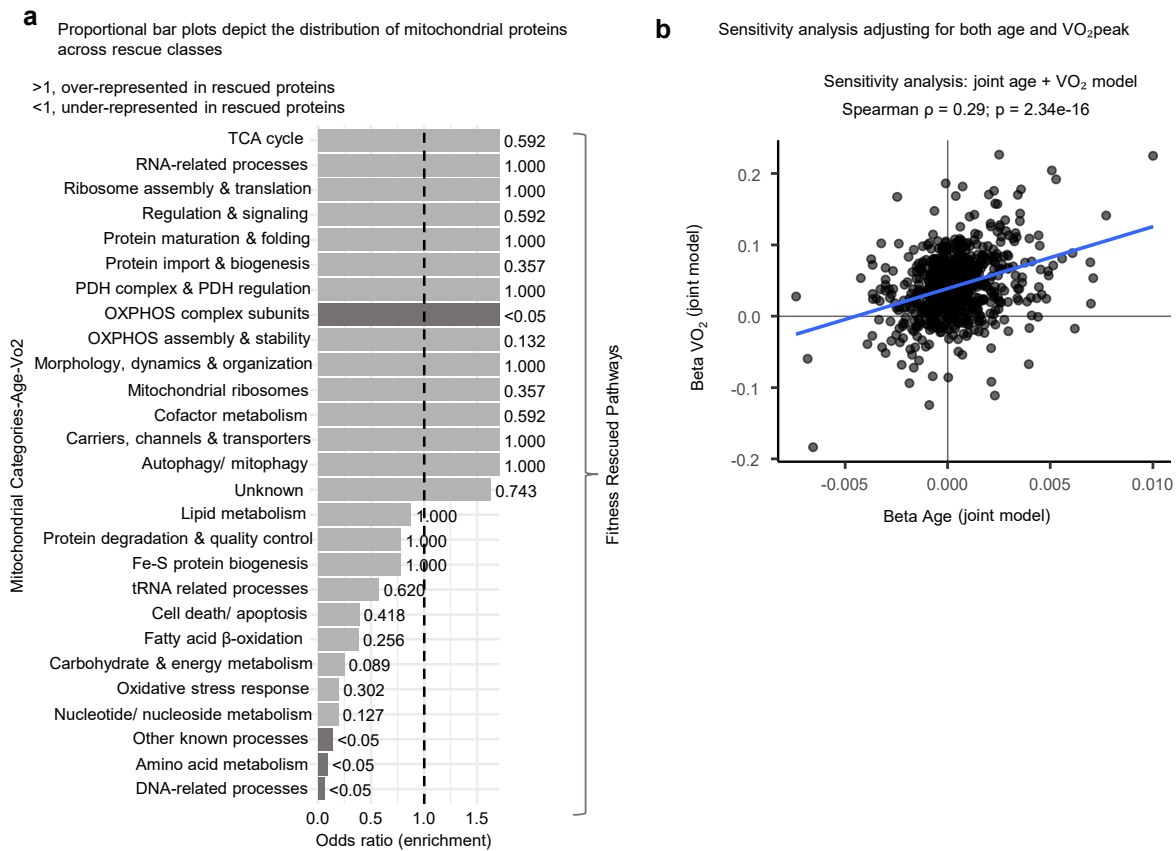

**Supplementary Fig. 3. Cardiorespiratory fitness strongly opposes age-related remodeling of the mitochondrial proteome. a**, Odds ratios show enrichment or depletion of  $VO_2$ -rescued proteins across mitochondrial functional categories relative to the remainder of the annotated mitochondrial proteome. Categories with odds ratios greater than 1 are enriched for  $VO_2$ -rescued proteins, whereas categories with odds ratios less than 1 are depleted. **b**, Sensitivity analysis adjusting for both age and  $VO_2$ peak. Scatterplot showing the relationship between regression coefficients for age and  $VO_2$ peak derived from linear models including both predictors simultaneously (protein  $\sim$  age +  $VO_2$ peak + covariates). Each point represents a mitochondrial protein. Spearman correlation coefficient ( $\rho = 0.29$ ,  $P = 3.1 \times 10^{-16}$ ) is shown.

**Supplementary Fig 4. Mitochondrial proteomic signatures are coupled to energetic capacity across molecular and physiological levels**

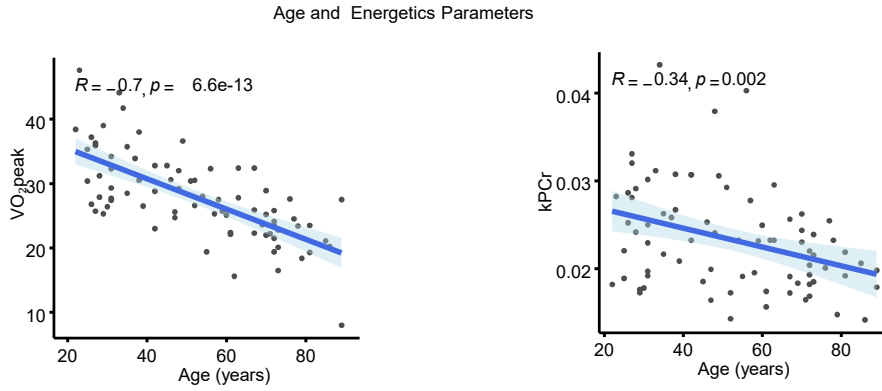

**Supplementary Fig 4. Associations of age with VO<sub>2</sub>peak and kPCr in 96 GESTALT participants.** Left, age and VO<sub>2</sub>peak. Right, age and kPCr. Each gray circle represents one participant. Associations between age, kPCr and VO<sub>2</sub>peak were assessed using two-sided Pearson correlation, the blue line shows the least-squares linear regression fit with 95% confidence interval.

**Supplementary Fig 5. PA-rescued muscle mitochondrial signatures are associated with altered cross-tissue mitochondrial coordination**

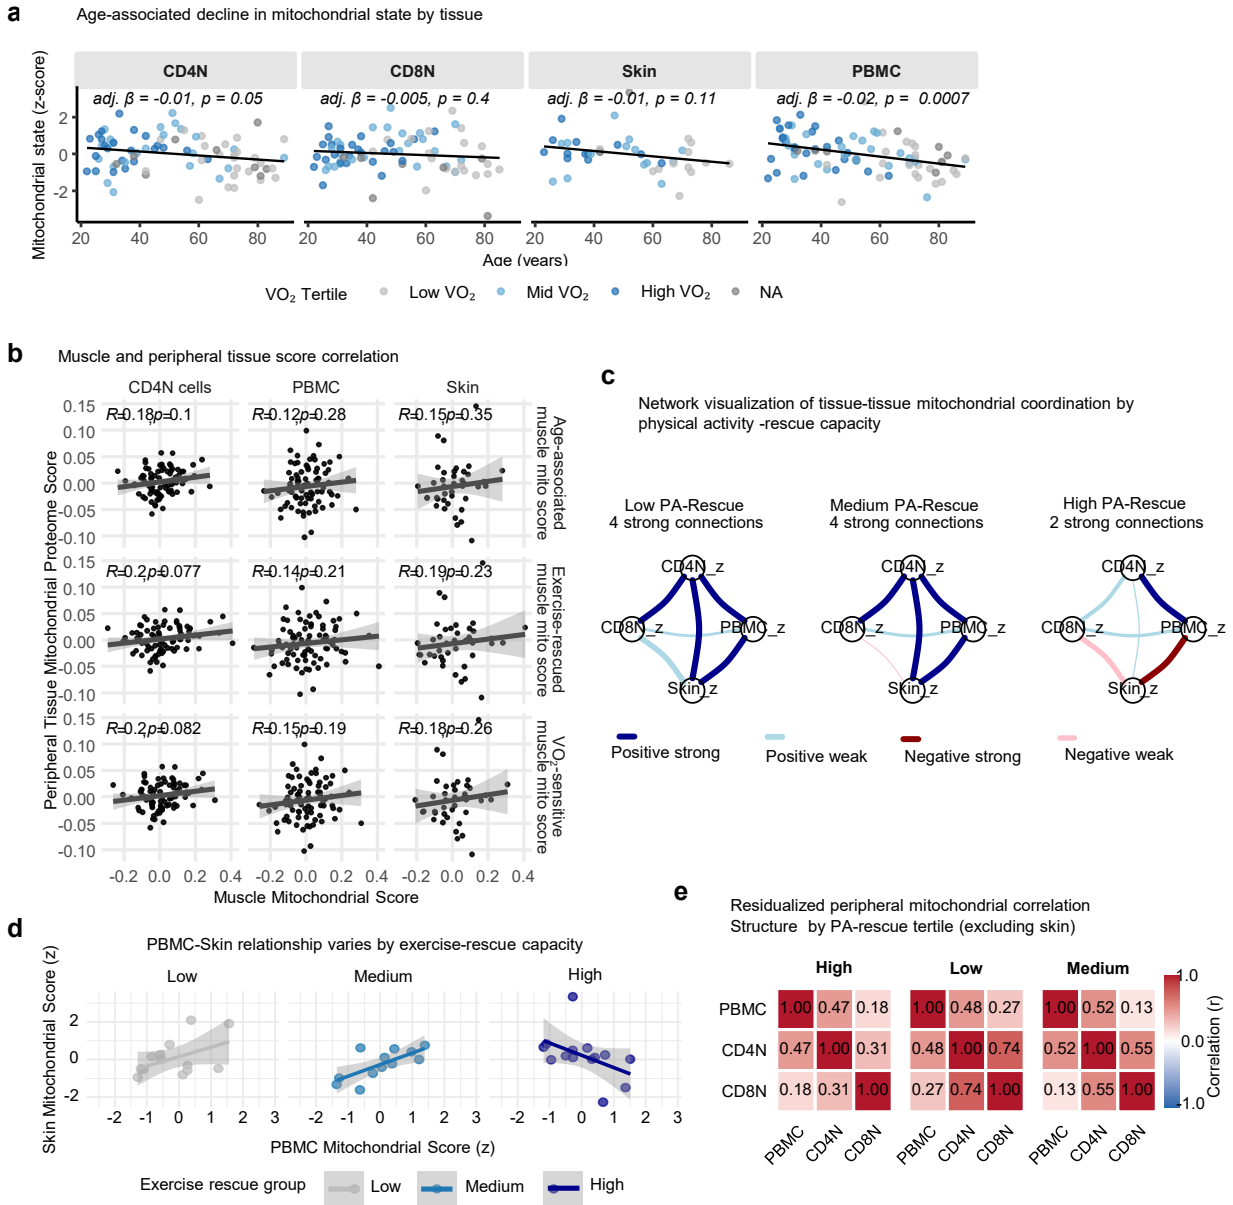

**Supplementary Fig.5 PA-rescued muscle mitochondrial signatures are associated with altered cross-tissue mitochondrial coordination.** **a**, Heterogeneous association of age with mitochondrial score across systemic tissues. Scatterplots showing the association between participant age (x-axis) and the normalized mitochondrial state z-score (y-axis) across four systemic tissues. Each point represents an individual participant, colored according to their VO<sub>2</sub>max tertile (Low, gray; Mid, light blue; High, dark blue). The solid black line in each panel represents the unadjusted linear regression fit for visual guidance. Beta coefficient ( $adj. \beta$ ) and corresponding p-value ( $adj. p$ ) for the age term, derived from a multiple linear regression model adjusting for participant sex and BMI. **b**, Muscle and peripheral tissue score correlation. Each point represents an individual participant. **c**, Network representation of peripheral mitochondrial

correlation structure by PA-rescue tertile. Nodes represent PBMCs, CD4N, CD8N cells, and skin, and edges represent pairwise correlations based on mitochondrial scores. Edge width reflects absolute correlation magnitude and edge color indicates sign. **d**, PBMC-Skin mitochondrial score reverses directionality with physical activity -rescue tertile. Scatter plots show the relationship between PBMC mitochondrial score (x-axis, z-score) and skin mitochondrial score (y-axis, z-score) stratified by physical activity -rescue capacity tertiles. Gray = low rescue ( $r = 0.2$ ,  $p = 0.51$ ), light blue = medium rescue ( $r = 0.74$ ,  $p < 0.009$ ), dark blue = high rescue ( $r = -0.31$ ,  $p < 0.26$ ). Lines represent linear regression with 95% confidence intervals (shaded regions).  $n = 32$  per group. **e**, Residualized peripheral mitochondrial correlation structure excluding skin. Heatmaps show pairwise correlations among residualized mitochondrial scores from PBMCs, CD4N, and CD8N T cells within low, medium, and high PA-rescue tertiles. Tissue scores were residualized for age, sex, BMI, and fiber ratio before within-group correlation analysis. Compared with the full peripheral analysis including skin, group differences were attenuated, indicating that the principal cross-compartment shifts were driven primarily by skin-linked relationships. A weaker residual pattern remained among blood-derived compartments, particularly reduced CD4N and CD8N T-cell correlation in the high PA-rescue group.
